# Supplementary material for: Phytochemical Profile, Antioxidant Potential and Toxicity Evaluation of the Essential Oils from Duguetia and Xylopia Species (Annonaceae) from the Brazilian Amazon
Source: MDPI journal article supplement (doi:10.3390/antiox11091709), 2022-08-30

Supplementary material. S1.

## Phytochemical Profile, Antioxidant Potential and Toxicity Evaluation of the Essential Oils from *Duguetia* and *Xylopia* Species (*Annonaceae*) from Brazilian Amazon

Márcia Moraes Cascaes<sup>1</sup>, Ângelo Antônio Barbosa de Moraes<sup>2</sup>, Jorddy Neves Cruz<sup>3</sup>, Celeste de Jesus Pereira Franco<sup>2</sup>, Renan Campos e Silva<sup>1</sup>, Lidiane Diniz do Nascimento<sup>2</sup>, Oberdan Oliveira Ferreira<sup>4</sup>, Tainá Oliveira dos Anjos<sup>5</sup>, Mozaniel Santana de Oliveira<sup>2\*</sup>, Giselle Maria Skelding Pinheiro Guilhon<sup>1</sup>, Eloisa Helena de Aguiar Andrade<sup>1,2,4</sup>

<sup>1</sup>Programa de Pós-Graduação em Química, Universidade Federal do Pará, Rua Augusto Corrêa S/N, Guamá, Belém 66075-900, PA, Brazil. giselle@ufpa.br (G. M. S. P. G), renan.c.silva@outlook.com (R.C.S)

<sup>2</sup>Laboratório Adolpho Ducke-Coordenação de Botânica, Museu Paraense Emílio Goeldi, Av. Perimetral, 1901, Terra Firme, Belém 66077-830, PA, Brazil. eloisa@museu-goeldi.br (E.H.A.A.). angeloquimica17@gmail.com (Â.A.B.M). lidianenascimento@museu-goeldi.br (L.D.N.), celeste.frango12@gmail.com (C.J.P.F.)

<sup>3</sup>Laboratory of Functional and Structural Biology, Institute of Biological Sciences, Universidade Federal do Pará, Rua Augusto Corrêa S/N, Guamá, Belém 66075-900, Pará, Brazil. jorddynevescruz@gmail.com (J.N.C)

<sup>4</sup>Programa de Pós-Graduação em Biodiversidade e Biotecnologia-Rede Bionorte, Universidade Federal do Pará, Rua Augusto Corrêa S/N, Guamá, Belém 66075-900, PA, Brazil. oberdan@museu-goeldi.br (O.O.F.)

<sup>5</sup>Programa de Pós-graduação em Ciências Biológicas-Botânica Tropical, Museu Paraense Emílio Goeldi/Universidade Federal Rural da Amazônia, Av. Perimetral, 1901, Terra Firme, Belém 66077-830, PA, Brazil. tainadosanjoscb@gmail.com (T.O.A)

\* Correspondence: cascaesmm@gmail.com; Tel.: +55-91-982024161 (M.M.C); mozaniel.oliveira@yahoo.com.br or mozanieloliveira@museu-goeldi.br; tel +55 91 988647823 (M.S.O).

*Supplementary material. S1.*

Figure S1. Ions-chromatogram relating to the chemical profile of essential oils from different species of *Annonaceae*.

*Xylopiamarginata*.

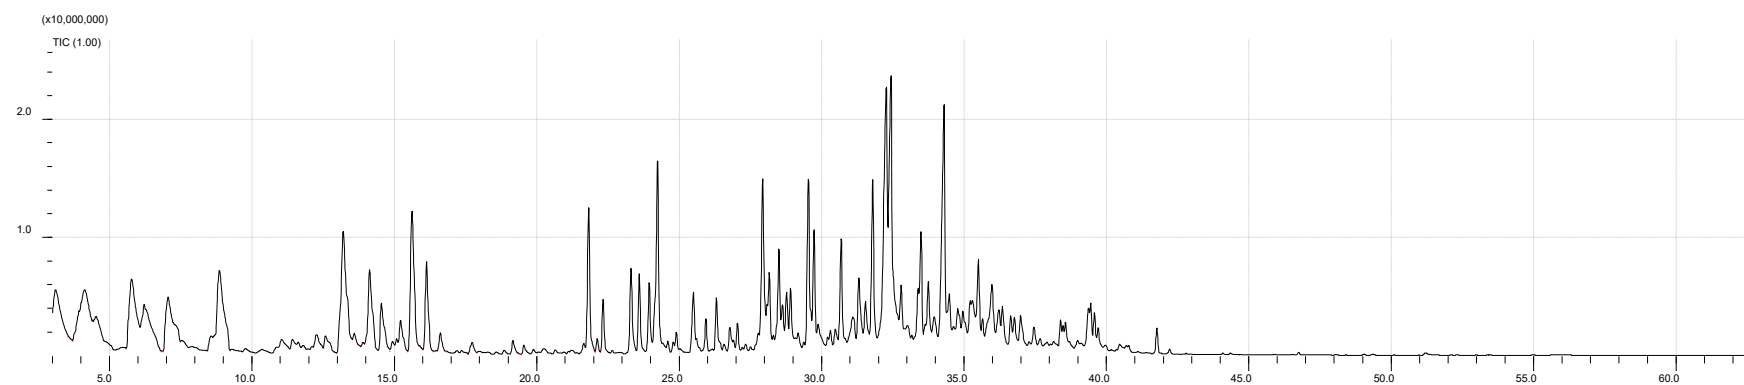

*Xylopiافرutescens*

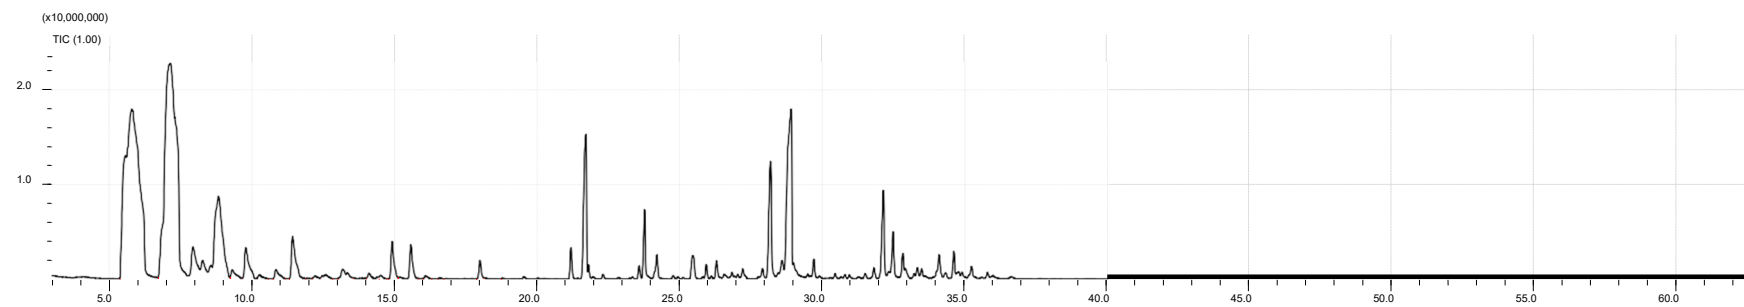

*Duguetia riparia*

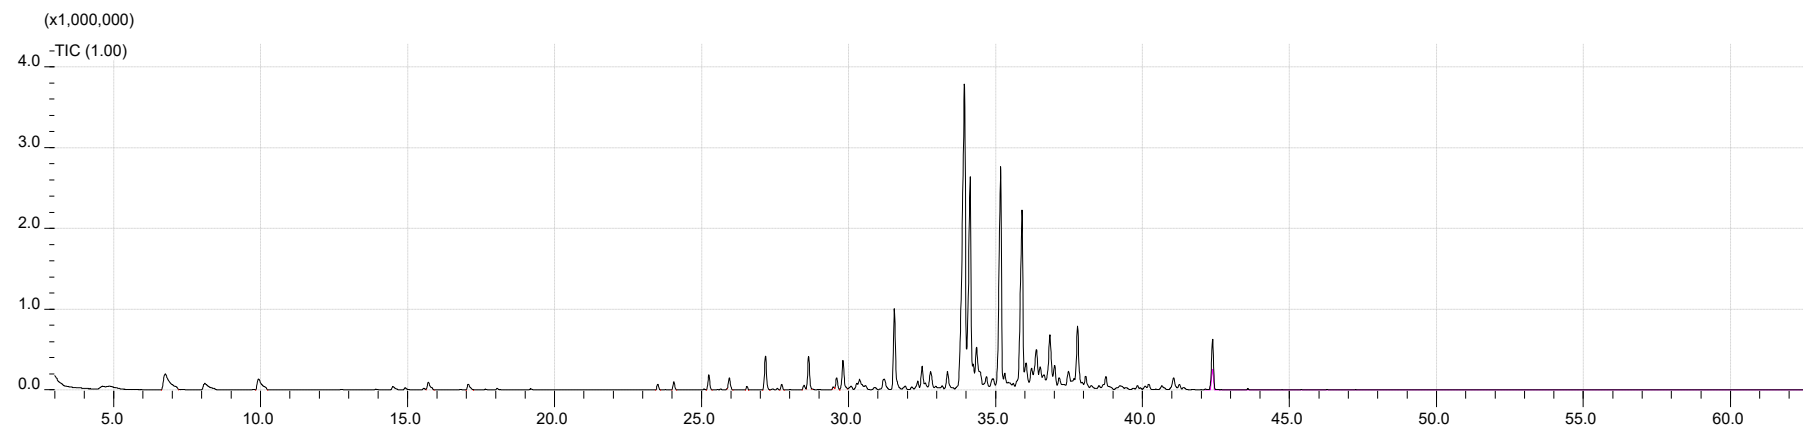

*Duguetia echinophora*

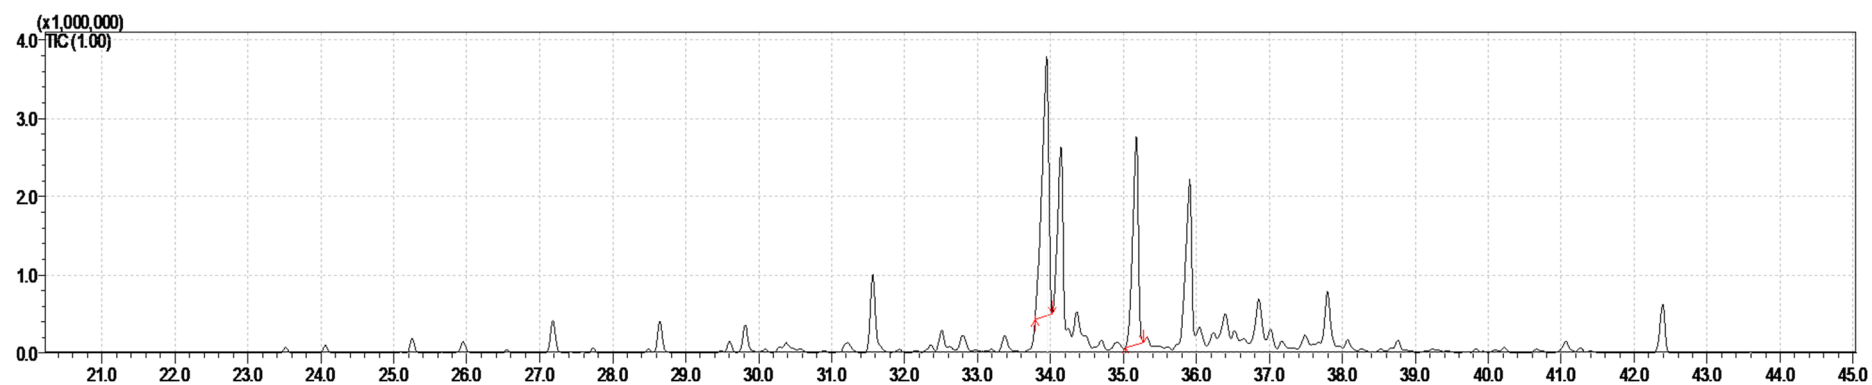

Supplement: s1 [file s1]
